# Supplementary material for: Extracellular vesicles from neural progenitor cells promote functional recovery after stroke in mice with pharmacological inhibition of neurogenesis
Source: Springer Nature journal article supplement (doi:10.1038/s41420-023-01561-4), 2023-07-28

Supplemental material

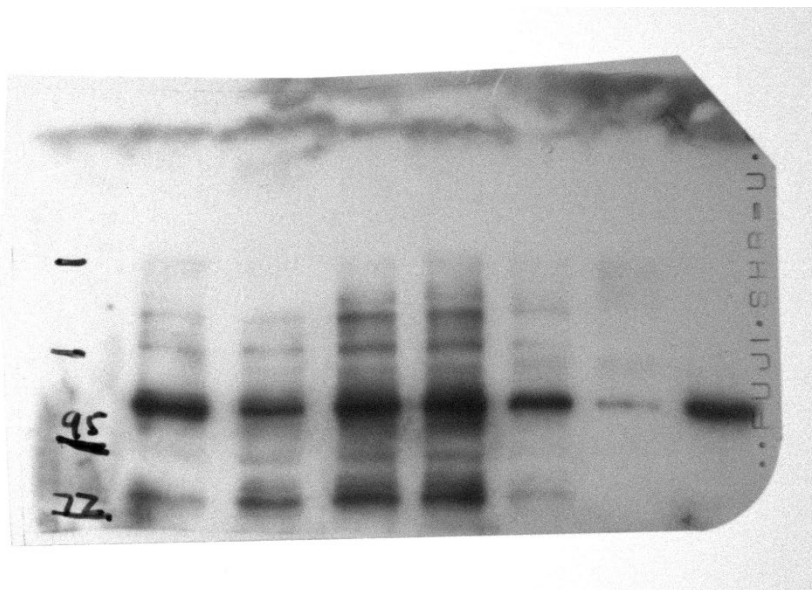

Figure S1. Uncropped WB image of HIF-1. Corresponding to Figure 1F top panel.

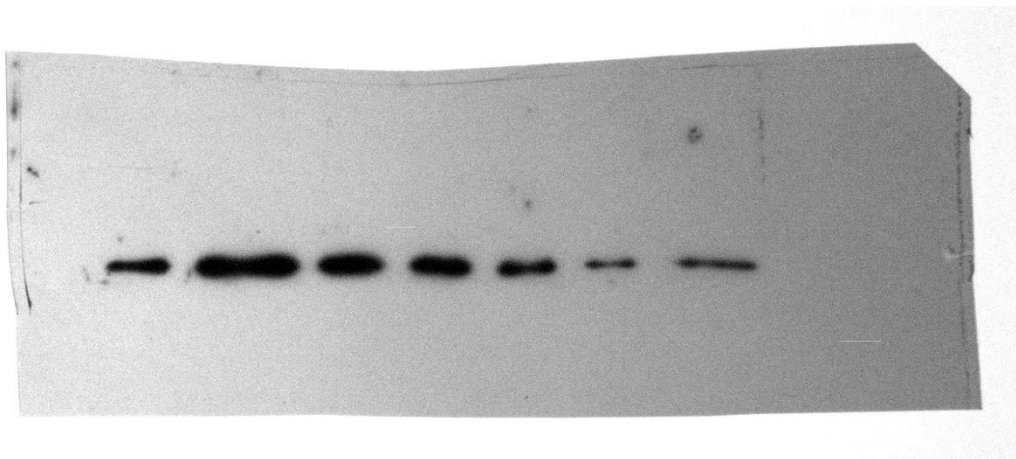

Figure S2. Uncropped WB image of GAPDH. Corresponding to Figure 1 bottom panel.

# Uncropped agarose gels from Figure 1G

VEGF

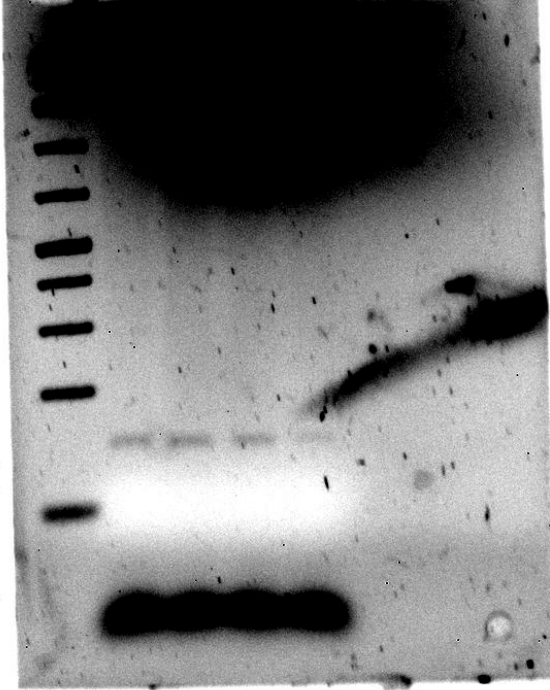

GAPDH

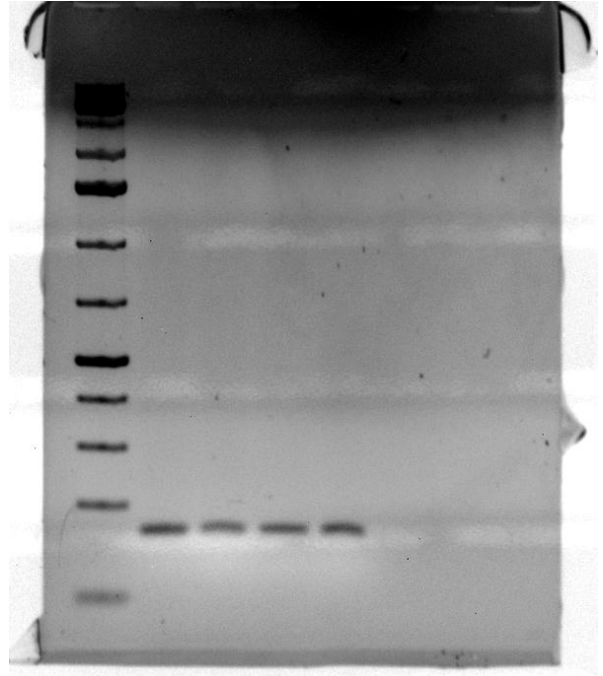

Supplement: MOESM1 [file 41420_2023_1561_MOESM1_ESM.pdf]
